# Supplementary material for: Modular perovskite-BiVO4 artificial leaves towards syngas synthesis on a m2 scale
Source: Royal Society of Chemistry journal article supplement (doi:10.1039/d4ee05780e), 2025-01-01
Supplement: d4ee05780e1.pdf [file d4ee05780e1.pdf]

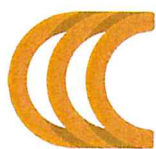

INNOVHUB  
STAZIONI SPERIMENTALI  
PER L'INDUSTRIA

innovazione e ricerca

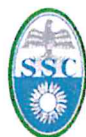

STAZIONE SPERIMENTALE  
PER I COMBUSTIBILI  
SEDE OPERATIVA:  
Via Galileo Galilei, 1  
20097 San Donato Milanese MI  
Tel +39 02.8515.3500  
sales.innovhub@mi.camcom.it  
www.innovhub-ssi.it

**Customer:**

**COMMISSIONE EUROPEA JOINT RESEARCH CENTRE**  
Via Enrico Fermi, 2749  
21027 ISPRA (VA)

**Test Report N°: RPT-SSC-220261**

## **Sampling, volumetric determination and compositional analysis of fuel gases.**

Issue date: 13/07/2022

Reference: JRC/IPR/2022/VLVP/1181

**Report on sample(s):**

S-SSC-2202173: UCambridge gas sampling bag (1 l) – reactor named "LR3" sampling date 07/07/2022 – sampling time 12:45 - at JRC ISPRA (VA).

S-SSC-2202174: UCambridge gas sampling bag (1 l) – tank named "LT2" sampling date 07/07/2022 – sampling time 13:18 - at JRC ISPRA (VA).

S-SSC-2202175: UCambridge gas sampling bag (1 l) – reactor + tank named "MRT1" sampling date 07/07/2022 – sampling time 13:31 - at JRC ISPRA (VA).

Start date of the test: 07/07/2022

End date of the test: 08/07/2022

**Laboratory Manager**

**Gabriele Migliavacca**

**Area Manager**

**Angelo Lunghi**

**Dott. Davide Faedo**

The Laboratory is responsible for all information provided in the Test Report, except for information provided by the Customer. The results relate only to the sample tested. The results refers to the sample as received when sampling is not performed by the Laboratory. When applicable, sample remnant is retained for three months from the date of issue of the Test Report. The partial reproduction of this Test report is allowed only after written permission of the Laboratory Manage

Test Report N°: RPT-SSC-220261

Pg. 1 di 3

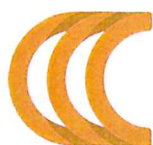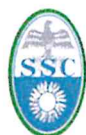

Commissioned by the Joint Research Center of the European Commission (order n. C.B689014, 2022-05-18), Innovhub SSI conducted the sampling and analysis of combustible gases at the Ispra (VA) site.

Specifically, on July 7<sup>th</sup> 2022, gas samples were collected in bags (Supel<sup>TM</sup> inert foil gas sampling bag screw cap valve, 1l by Supelco) from pilot plants for the implementation of artificial photosynthesis. The collected samples were transferred to the Innovhub-SSI laboratories in San Donato Milanese (MI) and analyzed by gas chromatography (GC) according to the standardized analytical method ASTM D1946-90(2019). The total volume of gas produced by each pilot plant and the high calorific value (HCV) and low calorific value (LCV) have been estimated as well.

### Gas sampling

For the plant by the University of Cambridge, the gas was displaced from four different containers using the hydrostatic pressure of the water by means of a connection between the container and a tank of water placed at a higher altitude. The outcoming gas was collected in several different bags, the volume of the gas was measured using a TSI 4100 Series gas meter and checked by comparison with the amount of displacing water used. Three bags (1 l each) were held by Innovhub-SSI to be transported to the laboratory, while the others remained on site for subsequent tests. The container were named as follows:

- Large Reactor (LR), a transparent plastic box partially filled with water
- Large Tank (LT), a plastic tank connected to the LR and partially filled with water
- Medium Reactor (MR), a transparent plastic box partially filled with water (smaller than the LR)
- Medium Tank (MT), a plastic tank connected to the MR and partially filled with water

In the Table below the overall volume of gas is reported for each container as long as the composition of the analyzed bag; the gas from MR and MT were collected together in the same bag, named MRT. The number associated with the code refers to the progressive order of the bags taken from each container (eg. LR-3 indicates the third bag sampled by LR)

### Results

| PARAMETER           | Value  | Units                              | Method               |
|---------------------|--------|------------------------------------|----------------------|
| Sample LR3          |        |                                    |                      |
| Gas Volume          | 4939   | cm <sup>3</sup> (@21,1°C-101,3KPa) | -                    |
| CH <sub>4</sub>     | < 0.01 | % V/V (renormalized)               | ASTM D 1946-90(2019) |
| CO <sub>2</sub>     | 1.61   | % V/V (renormalized)               | ASTM D 1946-90(2019) |
| O <sub>2</sub> + Ar | 20.08  | % V/V (renormalized)               | ASTM D 1946-90(2019) |
| N <sub>2</sub>      | 76.87  | % V/V (renormalized)               | ASTM D 1946-90(2019) |
| CO                  | 0.64   | % V/V (renormalized)               | ASTM D 1946-90(2019) |
| H <sub>2</sub>      | 0.80   | % V/V (renormalized)               | ASTM D 1946-90(2019) |
| LCV                 | 158    | KJ/m <sup>3</sup>                  | Calculated @ 15 °C   |
| HCV                 | 173    | KJ/m <sup>3</sup>                  | Calculated @ 15 °C   |



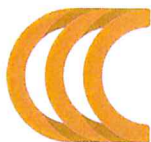

INNOVHUB  
STAZIONI SPERIMENTALI  
PER L'INDUSTRIA

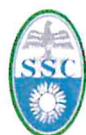

STAZIONE SPERIMENTALE  
PER I COMBUSTIBILI  
SEDE OPERATIVA:  
Via Galileo Galilei, 1  
20097 San Donato Milanese MI  
Tel +39 02.8515.3500  
sales.innovhub@mi.camcom.it  
www.innovhub-ssi.it

innovazione e ricerca

| PARAMETER       | Value  | Units                              | Method               |
|-----------------|--------|------------------------------------|----------------------|
| Sample LT2      |        |                                    |                      |
| Gas Volume      | 701    | cm <sup>3</sup> (@21,1°C-101,3KPa) | -                    |
| CH4             | < 0.01 | % V/V (renormalized)               | ASTM D 1946-90(2019) |
| CO2             | 0.01   | % V/V (renormalized)               | ASTM D 1946-90(2019) |
| O2 + Ar         | 21.66  | % V/V (renormalized)               | ASTM D 1946-90(2019) |
| N2              | 77.32  | % V/V (renormalized)               | ASTM D 1946-90(2019) |
| CO              | 0.43   | % V/V (renormalized)               | ASTM D 1946-90(2019) |
| H2              | 0.58   | % V/V (renormalized)               | ASTM D 1946-90(2019) |
| Unidentified HC | < 0.01 | % V/V (renormalized)               | ASTM D 1946-90(2019) |
| LCV             | 111    | KJ/m3                              | Calculated @ 15 °C   |
| HCV             | 122    | KJ/m3                              | Calculated @ 15 °C   |

| PARAMETER   | Value  | Units                              | Method               |
|-------------|--------|------------------------------------|----------------------|
| Sample MRT1 |        |                                    |                      |
| Gas Volume  | 550    | cm <sup>3</sup> (@21,1°C-101,3KPa) | -                    |
| CH4         | 0.01   | % V/V (renormalized)               | ASTM D 1946-90(2019) |
| CO2         | 0.05   | % V/V (renormalized)               | ASTM D 1946-90(2019) |
| O2 + Ar     | 19.70  | % V/V (renormalized)               | ASTM D 1946-90(2019) |
| N2          | 78.53  | % V/V (renormalized)               | ASTM D 1946-90(2019) |
| CO          | 0.15   | % V/V (renormalized)               | ASTM D 1946-90(2019) |
| C2H4        | < 0.01 | % V/V (renormalized)               | ASTM D 1946-90(2019) |
| H2          | 1.56   | % V/V (renormalized)               | ASTM D 1946-90(2019) |
| LCV         | 181    | KJ/m3                              | Calculated @ 15 °C   |
| HCV         | 211    | KJ/m3                              | Calculated @ 15 °C   |
